# Supplementary material
Source: PubMed Central journal article supplement (PMC2099259)

Bondareva et al., Supplemental section.

**Isolation of *txnrd1* genomic clone and construction of targeting vector.** A single *txnrd1* genomic clone of about 19 kb in length was isolated in a screen of  $8 \times 10^5$  plaques from a mouse strain 129XI genomic library in a lambda-FIX II vector (Stratagene) using a [ $^{32}$ P]-labeled mouse Txnrd1 5' cDNA fragment [1] as probe. The full-length *Not* I/*Not* I insert was subcloned into a pBlueScript KS+ vector (Stratagene). The insert was restriction mapped and a 14-kb *Kpn* I/*Not* I sub-fragment that contained exons 1-5 was sequenced and used for production of the targeting vector (Fig. 1a)<sup>1</sup>. Briefly, the clone was cut with *Kpn* I, blunted with T4 DNA polymerase, and cut with *Not* I. The resultant 14-kb blunt/*Not* I fragment was inserted into TK1-TK2C vector [2] that had been cut with *Xho* I, filled with Klenow, and cut with *Not* I, thus flanking the insert with an expressed HSV-*tk* gene for use in positive/negative selection [2, 3]. The loxP-flanked MC1-neo selectable marker cassette was amplified by PCR using the KT1LoxA plasmid as template [4] and primers Neo-5' and Neo/LoxP-3' (Table S1). The PCR product was digested with *Sal* I and ligated into the unique *Xho* I site in the *txnrd1* insert, thereby killing the site, and a clone bearing the correct orientation was selected based on the asymmetric *Xba* I site (Fig. 1a). The downstream co-linearly-oriented loxP site was inserted by annealing equimolar amounts of primers LoxP-Bgl2-5' and LoxP-Bgl2-3' (Table S1), ligating the annealed product into the unique *Bam* HI site (thereby killing the site), and screening for correct orientation by sequencing. All cloning junctions in the final targeting vector were confirmed by sequencing.

The targeting vector was linearized with *Not* I and was electroporated into mouse strain 129XI ES cells. G418/ganciclovir double-resistant clones (144 total) were isolated, expanded, and split into two cultures; one of which was used for genomic DNA production and one of which was frozen. Genomic DNA was digested with *Xba* I and analyzed by Southern blotting (Fig. S1a) using the *Xba* I/*Kpn* I probe shown in Fig. 1a. Clones containing a targeted insertion of the upstream loxP-MC1-neo marker at the *Xho* I site (59 of 144) were screened by amplifying across the *Bam* HI site by radioactive PCR for the downstream loxP site using primers Txnrd1-D and -E (Fig. 1a, Table S1), resolving the products on a 6.5% polyacrylamide/8 M urea sequencing gel, and exposing the dried gel to X-ray film (Fig. S1b). Eight of the 59 neo-targeted clones also bore a loxP site at *Bam* HI; one of these was chosen for mouse production.

ES cells from the selected clone were used for chimeric mouse production by injection into C57Bl/6J blastocysts. Highly chimeric phenotypically male pups were bred to C57Bl/6J dams and genomic DNA samples were isolated from agouti pups. Genotype was determined by PCR using primers Txnrd1-B, -C, and -G (Figs 1a, 1b, Table S1, and data not shown), and pups bearing the targeted allele were selected for subsequent husbandry. These pups were heterozygous for the conditional (*txnrd1<sup>cond</sup>*) allele; the line has since been extensively backcrossed to C57Bl/6J animals to produce a line with the conditional allele on a homogeneous C57Bl/6J background. Animals from this colony were crossed to members of our colony of the “deleter” strain of mice, which bear an X chromosome-linked *Cre*-transgene [5] to generate the *txnrd1<sup>-</sup>* line. These mice have now been back-crossed onto C57Bl/6J more than ten generations. No changes in phenotype have been observed as a result of back-crossing (not shown).

**In situ hybridizations.** Probes for *in situ* hybridizations were transcribed with the following enzymes and templates: Brachyury (t), 284 bp partial cDNA clone extending from position 1763 – 2046 (NCBI accession # X51683) in pBlueScript KS, linearized with *Bam* HI and transcribed

with T3 RNA polymerase (RNAP) [6]. Cripto, 983 bp partial cDNA clone extending from position 41 – 1024 (NCBI accession # NM\_011562) in pBluescript II KS+, linearized with *Hind* III and transcribed with T7 RNAP [7]. Lim1, 2.17 kb partial cDNA from position 370 – 2543 (NCBI accession # NM\_008498) cloned into plasmid pBluescript KS-, linearized with *Hind* III and transcribed with T7 RNAP [8]. Fgf8, 699 bp partial cDNA from position 39 – 738 (NCBI accession # U18673) in plasmid pGem92F-, linearized with *Hind* III and transcribed with T7 RNAP [9]. Snail1, 470 bp partial cDNA (NCBI accession # NM\_011427) in pGEM7 2f+, linearized with *Bam* HI and transcribed with T7 RNAP [10].

Transcription reactions for generating digoxigenin-labeled probes used 2.5 µg of the linearized templates indicated above and the corresponding RNAP from either Promega or New England Biolabs with the corresponding manufacturer's buffer, in 50 µl reactions containing 0.5 mM ATP, CTP, and GTP; 0.33 mM UTP; 0.17 mM digoxigenin-11-UTP (Roche); 20 µCi alpha-[<sup>32</sup>P]CTP (800 Ci/mmol); and 1 U/µl RNasin (Promega). Reactions were incubated 2 h at 37°C and then each received 200 µg yeast RNA and 2.5 U RNase-free DNase (Fisher). Incubation was continued at 37°C for 20 min and reactions were stopped by adding 130 µl of a buffer containing 1% SDS, 20 mM EDTA, 20 mM Tris, pH 7.5, and 100 mM NaCl. Samples were desalted on Sephadex G-50-fine columns in the same buffer. Probe yield was calculated from percent incorporation of radio-labeled CTP.

Embryos from timed matings between *txnrd1*<sup>-/+</sup> parents were harvested at E7.5 or E8.5 into ice-cold PBST (PBS containing 0.1% Tween-20). After harvest, embryos were fixed overnight at 4°C in PBST containing 4% paraformaldehyde, washed in PBST, and serially dehydrated into 100% methanol. Embryos from multiple age-matched litters were pooled and groups of about 12 embryos (typically from 2-3 litters) were processed for each probe.

Embryos were serially rehydrated into PBST and were incubated 2 h at room temperature in PBST containing 6% H<sub>2</sub>O<sub>2</sub>. They were washed 3 times with PBST and then incubated 5 min at room temperature in PBST containing 10 µg/ml proteinase K. Embryos were washed 2 times with 2 mg/ml glycine in PBST followed by two washes with PBST. Embryos were re-fixed for 20 min at room temperature in 4% paraformaldehyde, 0.2% glutaraldehyde in PBST and washed 3 times in PBST. Embryos were pre-hybridized for 2 h at 65°C in hybridization buffer (50% formamide, 1X Denhardt's, 5X SSC, 1% SDS, 50 µg/ml heparin, 50 µg/ml yeast RNA) and were then hybridized overnight at 65°C in hybridization buffer containing 0.5 µg/ml of digoxigenin-labeled RNA probe. Embryos were then washed twice for 30 min at 65°C in solution I (50% formamide, 5X SSC, 1% SDS), once for 10 min at 65°C in 50% solution I, 50% solution II (0.5 M NaCl, 10 mM Tris-Cl, pH. 7.5, 0.1% Tween-20), 3 times for 5 min at room temperature in solution II, and incubated 1 hr at 37°C in solution II containing 100 µg/ml RNase A and 100 U/ml RNase T1. Embryos were washed twice for 30 min at 65°C in solution III (50% formamide, 2X SSC) and 3 times for 5 min at room temperature in TBST (10 mM Tris, pH 7.5, 137 mM NaCl, 2.7 mM KCl, 0.1% Tween-20). Embryos were blocked in TBST containing 10% sheep serum at room temperature for 2.5 h and incubated at 4°C overnight in TBST containing 10% sheep serum and a 1:2,000 dilution of alkaline phosphatase-conjugated anti-digoxigenin Fab fragment (Roche) that was pre-adsorbed against mouse embryo acetone extract. The next day, embryos were washed 3 times for 5 min at room temperature in TBST, 6 times for 1 h at room temperature in TBST, and twice for 20 min in AP buffer (100 mM Tris, pH 9.5, 50 mM MgCl<sub>2</sub>, 100 mM NaCl, 0.1% Tween-20). Embryos were then incubated in AP buffer containing 337 µg/ml nitro blue tetrazolium (NBT, Fisher) and 175 µg/ml 5-bromo-4-chloro-3-indolyl

phosphate p-toluidine (BCIP, Fisher) and color reaction was allowed to develop 2-16 h, as optimized for each probe. Color development reactions were stopped by placing embryos in PBST containing 5 mM EDTA. Embryos were re-fixed in PBST containing 4% paraformaldehyde for 4 h at room temperature and washed twice for 5 min in PBST containing 5 mM EDTA and were serially dehydrated into 100% methanol. Embryos were serially rehydrated into PBST containing 5 mM EDTA and were then serially equilibrated into 4:1 glycerol:PBST mixture.

Embryos were segregated into separate vials, individually labeled, and photographed. For subsequent genotyping, each embryo was transferred into a labeled tube containing 10  $\mu$ l of digestion solution (50 mM Tris, pH 7.5, 100 mM NaCl, 100 mM EDTA, 1% SDS, 100  $\mu$ g/ml proteinase K) and incubated at 52°C overnight. Samples were diluted to 100  $\mu$ l with 1 mM Tris, pH 7.5, 0.5 mM EDTA, 0.1% SDS, 250 mM NaCl, extracted with an equal volume of phenol/chloroform/isoamyl alcohol (25:24:1) and nucleic acids were precipitated with 300  $\mu$ l ethanol. Nucleic acids were resuspended in 20  $\mu$ l TE and 0.5  $\mu$ l was used in radio-labeled PCR genotyping reactions (Fig. 1c).

**Single-embryo cDNA production, RT-PCR, real-time PCR, and oligonucleotide array analyses.** Pregnant uteri were harvested into ice-cold PBS; embryos were dissected out and placed into individual 0.5 ml tubes containing 10  $\mu$ l 1X TES (10 mM Tris, pH 7.5, 5 mM EDTA, 1% SDS) with 100  $\mu$ g/ml proteinase K. Tubes were sealed and incubated 2-20 hours at 52°C. Samples received 90  $\mu$ l of 0.1X TES, 5  $\mu$ l of 5 M NaCl, were extracted with an equal volume of phenol/chloroform/isoamyl alcohol (25:24:1) followed by pure chloroform, and were precipitated with 300  $\mu$ l ethanol at -20°C overnight. Nucleic acid was precipitated and resuspended in 10  $\mu$ l water. A portion (1-3  $\mu$ l) was used for radioactive PCR-based genotypic analyses (Fig. 1c), and the remainder was used for cDNA production. All samples used for either RT-PCR or array analyses had been molecularly genotyped as shown in Fig. 1c.

For cDNA production, total nucleic acid from the embryos (typically 75% of the embryo) was used with the two-cycle cDNA synthesis system (Affymetrix) using the manufacturer's recommended conditions. For RT-PCR and real-time PCR analyses (see below) cDNAs were diluted 10-fold with water. For oligonucleotide array analyses, cDNAs were transcribed to produce biotin-labeled cRNA probes using the IVT reaction system (Affymetrix) by the manufacturer's recommended protocols.

cRNA probes were fragmented and were hybridized to mouse oligonucleotide gene expression arrays (Affymetrix, version 430-2.0) by the manufacturer's recommended protocols. Arrays were read by an Affymetrix array reader and data from all six arrays were analyzed statistically using GeneSpring (Agilent), as described in text. Data included in tables met the following criteria: 1) upon averaging data over the three pair of littermate embryos (six arrays), signals were consistent enough to give a P-value  $\leq 0.05$ ; 2) sequences on which probe set was based were annotated by Affymetrix or could be annotated with GeneSpring or BLAST. In addition, for Tables 2 and 3, the average abundance of each mRNA differed by  $\geq 3$ -fold between wild-type and mutant embryos.

For single embryo PCR-based verification reactions, litters were harvested from timed matings between *txnrd1*<sup>-/+</sup> parents at E7.5, nucleic acids were extracted, and genotypes were determined as described above. cDNAs were prepared from *txnrd1*<sup>+/+</sup> and *txnrd1*<sup>-/-</sup> embryos as described above and each was resuspended in 50  $\mu$ l of water per embryo. For semi-quantitative

analyses, six identical standard PCR reaction mixes were prepared on ice containing 0.5 µl of cDNA and 0.2 pmol/µl each of the indicated primers (see figure legends, Table S1) in a standard PCR reaction mix, thermal-cycling was begun on all samples and individual tubes were removed and stopped by adding 1 µl 0.5 M EDTA and chilling on ice at sequential intervals depending on the empirical abundance of each mRNA. Samples were subjected to agarose gel electrophoresis and products were visualized by ethidium bromide staining. For real-time PCR analyses, reaction mixes were similar, but contained a 1:2 x 10<sup>5</sup> dilution of SYBR green solution (Invitrogen). Real-time PCR reactions were performed in a Perkin-Elmer 5700 machine and associated software was used for data analysis and presentation.

Because our goal was to use these cDNA samples as templates to generate probes for hybridization to oligonucleotide microarrays, we needed a means to evaluate the quality and comparability of each cDNA. As a first test, we evaluated the degree of 3'-bias in each sample by semi-quantitative PCR on ubiquitously expressed abundant (β-actin, ~ 10<sup>3</sup> mRNA molecules per cell) and rare (TATA-binding protein, TBP, <10 mRNA molecules per cell)[11] mRNAs (Fig. S2a). Our rationale was that decreases in RNA quality (i.e., endonucleolytic nicks) would un-tether 5' mRNA sequences from the poly(A) tail, resulting in an increase in the 3'-bias of the cDNA pool; comparable samples would have similar 5':3' ratios. Semi-quantitative PCR results showed similar 5':3' ratios for β-actin and for TBP (Fig. S2a). As a second test, we generated biotinylated cRNAs from six single embryo cDNAs (mutant and wild-type littermate pairs from three E7.5 litters), and hybridized each to a mouse oligonucleotide expression array. Raw hybridization signal data were analyzed for seven ubiquitously expressed housekeeping mRNAs whose expression levels varied over roughly a 1000-fold range (Fig. S2b). Results showed uniform hybridization signals for all seven mRNAs both within a genotype (represented by standard deviation on bars) and between the genotypes (compare wild-type and mutant bar heights). Finally, real-time PCR analyses for representative mRNAs using single-embryo *txnrd1*<sup>+/+</sup> and *txnrd1*<sup>-/-</sup> cDNA preparations showed product accumulation curves that matched array data and first-derivative melting curves that matched expected melting temperatures based on G/C content (Fig. S2c). We concluded that this approach provided reliable mRNA abundance profiles for mRNAs expressed at a wide range of levels in individual E7.5 embryos.

#### FOOTNOTES

<sup>1</sup>For all tables and figures, the prefix "S" indicates reference to an exhibit in the supplemental section; lack off a prefix indicates reference to an exhibit in the main text.

#### REFERENCES

- [1] Sun, Q. A., Kirnarsky, L., Sherman, S., and Gladyshev, V. N. Selenoprotein oxidoreductase with specificity for thioredoxin and glutathione systems. *Proc Natl Acad Sci U S A* **98**:3673-3678; 2001.
- [2] Mansour, S. L., Thomas, K. R., and Capecchi, M. R. Disruption of the proto-oncogene int-2 in mouse embryo-derived stem cells: a general strategy for targeting mutations to non-selectable genes. *Nature* **336**:348-352; 1988.
- [3] Thomas, K. R., and Capecchi, M. R. Targeted disruption of the murine int-1 proto-oncogene resulting in severe abnormalities in midbrain and cerebellar development. *Nature* **346**:847-850; 1990.

- [4] Deng, C., Thomas, K. R., and Capecchi, M. R. Location of crossovers during gene targeting with insertion and replacement vectors. *Mol Cell Biol* **13**:2134-2140; 1993.
- [5] Gu, H., Zou, Y. R., and Rajewsky, K. Independent control of immunoglobulin switch recombination at individual switch regions evidenced through Cre-loxP-mediated gene targeting. *Cell* **73**:1155-1164; 1993.
- [6] Herrmann, B. G., Labeit, S., Poustka, A., King, T. R., and Lehrach, H. Cloning of the T gene required in mesoderm formation in the mouse. *Nature* **343**:617-622; 1990.
- [7] Dono, R., Scalera, L., Pacifico, F., Acampora, D., Persico, M. G., and Simeone, A. The murine *cripto* gene: expression during mesoderm induction and early heart morphogenesis. *Development* **118**:1157-1168; 1993.
- [8] Barnes, J. D., Crosby, J. L., Jones, C. M., Wright, C. V., and Hogan, B. L. Embryonic expression of *Lim-1*, the mouse homolog of *Xenopus Xlim-1*, suggests a role in lateral mesoderm differentiation and neurogenesis. *Dev Biol* **161**:168-178; 1994.
- [9] MacArthur, C. A., Shankar, D. B., and Shackleford, G. M. Fgf-8, activated by proviral insertion, cooperates with the Wnt-1 transgene in murine mammary tumorigenesis. *J Virol* **69**:2501-2507; 1995.
- [10] Smith, D. E., Franco del Amo, F., and Gridley, T. Isolation of *Sna*, a mouse gene homologous to the *Drosophila* genes *snail* and *escargot*: its expression pattern suggests multiple roles during postimplantation development. *Development* **116**:1033-1039; 1992.
- [11] Schmidt, E. E., and Schibler, U. High accumulation of components of the RNA polymerase II transcription machinery in rodent spermatids. *Development* **121**:2373-2383; 1995.
- [12] Schmidt, E. E., and Schibler, U. Cell size regulation, a mechanism that controls cellular RNA accumulation: consequences on regulation of the ubiquitous transcription factors Oct1 and NF-Y and the liver-enriched transcription factor DBP. *J Cell Biol* **128**:467-483; 1995.

## FIGURE LEGENDS

Fig. S1, Identification of targeted ES cell clones. *a*, Southern blot of ES cell clones using *Xba* I-cut genomic DNA and the *Xba* I/*Kpn* I probe indicated in Fig. 1a. Selected clone identities are indicated above and positions of diagnostic bands are indicated at left. Of the 144 clones isolated, 59 (41%) bore a neo-targeted *txnrd1* allele. *b*, analysis for downstream loxP site. Diagnostic PCR using primer set D-E (Fig. 1a, Table S1) was used to determine which neo-targeted clones also contained the downstream loxP site. Eight of the 59 clones (6 of 46 clones shown on autoradiogram; 14% of neo-targets) bore the downstream loxP site.

Fig. S2, Assay verification for single embryo mRNA abundance analyses. *a*, RT-PCR cDNA quality control by analysis of 3':5' ratio for abundant ( $\beta$ -actin,  $\sim 10^3$  mRNA molecules per cell) and rare (TBP,  $< 10^1$  mRNA molecules per cell) housekeeping mRNAs [11, 12]. *b*, raw normalized microarray hybridization signals for representative housekeeping genes whose basal mRNA abundances differ across a  $10^3$ -fold range. Data points represent average  $\pm$  1 s.d. from three wild-type and three mutant E7.5 embryos, each analyzed on a separate microarray. *c*, real-time RT-PCR data quality for malic enzyme mRNA (*Mod1*),  $\beta$ -actin mRNA, and *Fgf13* mRNA. At left is the plot of fluorescence (log scale, arbitrary units) per cycle (cycles 1-36 plotted). At right is a first derivative plot of the melting curve over a linear range from 60 – 95°C. The peak for the *Mod1* PCR product, which was A/T-rich, was at 70.5°C; both  $\beta$ -actin and *Fgf13* peaks

were at 87.0°C. Abbreviations: ATP5b, ATP synthase  $\beta$ -chain precursor; Cyps, somatic cell cytochrome C; Eif2s2, translation initiation factor 2 subunit 2; Fgf13, fibroblast growth factor family member 13; Gapdh, glyceraldehyde-3-phosphate dehydrogenase; L7, large ribosomal subunit protein 7; Mod1, malic enzyme; TBP, TATA-binding protein.

Table S1. Oligonucleotide primer sequences

| name              | sequence                                                         |
|-------------------|------------------------------------------------------------------|
| Cbr3-3' Forward   | 5'-gtgacagtccttacgaggatcctg-3'                                   |
| Cbr3-3' Reverse   | 5'-tattgatcaaagcaggcacattaactgggtg-3'                            |
| Cdh2-3' Forward   | 5'-tatggatccagatactgtggagcctgatgc-3'                             |
| Cdh2-3' Reverse   | 5'-tatgaattcgacacgggtgctagtggactacag-3'                          |
| Fgf13-3' Forward  | 5'-ccatttagatcttcatactgttgcacatgg-3'                             |
| Fgf13-3' Reverse  | 5'-tatgaattcggtgcgtatttgggtatacaac-3'                            |
| Gclm1-3' Forward  | 5'-tatctcgagacatacagctactgactcacaatg-3'                          |
| Gclm1-3' Reverse  | 5'-tatagatctagaatacagtggttctctgtgagc-3'                          |
| Gstp1-3' Forward  | 5'-tatctcgagctcactaggaggacctgtccac-3'                            |
| Gstp1-3' Reverse  | 5'-tatgaattcgacagacctggggaggctactcc-3'                           |
| Igfbp1-3' Forward | 5'-tatctcgagctggactctgctggtgtgtcta-3'                            |
| Igfbp1-3' Reverse | 5'-tatgaattctggttacacaatcagcatcggaac-3'                          |
| LoxP-Bgl2-3'      | 5'-gatctataacttcgtatagcatacattatacgaagttata-3'                   |
| LoxP-Bgl2-5'      | 5'-gatctataacttcgtataatgtatgctatacgaagttata-3'                   |
| Mash2-3' Forward  | 5'-tatggatcctactcgtcggaggaaagcagctg-3'                           |
| Mash2-3' Reverse  | 5'-tatgaattctgtagagctctacaacagttcaag-3'                          |
| Mod1-3' Forward   | 5'-tatagatctaattatgaccagatcctacctga-3'                           |
| Mod1-3' Reverse   | 5'-tatctcgagcttctacatatcagtgaggac-3'                             |
| Neo/LoxP-3'       | 5'-acgcgtcgacataacttcgtataatgtatgctatacgaagttatgg-3'             |
| Neo-5'            | 5'-acgcgtcgacggatcttccgatgctgagcagtg-3'                          |
| Nodal-3' Forward  | 5'-tatctcgagtgggtctgtgacctgctgtccctc-3'                          |
| Nodal-3' Reverse  | 5'-tatagatctgccaagcatacatctcaggact-3'                            |
| Oligo(dT)-T7      | 5'-ggccagtgaattgtaatacagactcactatagggaggcgg(t) <sub>24</sub> -3' |
| Pcdh8-3' Forward  | 5'-tatagatctgacagtgactcggacatcagcgg-3'                           |
| Pcdh8-3' Reverse  | 5'-tatgaattctgaaaccgggtcaataacttag-3'                            |
| Pl1-3' Forward    | 5'-tatgaattctggagggaacttcaga-3'                                  |
| Pl1-3' Reverse    | 5'-tatagatcttatggatgtccctttta-3'                                 |
| Prdx1-3' Forward  | 5'-tgggcagaccaatcttctatcagtcac-3'                                |
| Prdx1-3' Reverse  | 5'-taggcaggtagatctttcagaggcca-3'                                 |
| Prdx2-3' Forward  | 5'-tctggtgaatagtgatcctgccctga-3'                                 |
| Prdx2-3' Reverse  | 5'-catgtctatgcacgttctgcccatgt-3'                                 |
| Prdx4-3' Forward  | 5'-gactgactatcgtgggaaataacttg-3'                                 |
| Prdx4-3' Reverse  | 5'-cacaatgacctttattgagaaggtcc-3'                                 |
| Sox11-3' Forward  | 5'-tatggatccgactactgcacgccggagctg-3'                             |
| Sox11-3' Reverse  | 5'-tatgaattcgtaacagttgtgccgcaaaagg-3'                            |
| Srxn1-3' Forward  | 5'-tgcaaacctagagtccaggaggcaat-3'                                 |
| Srxn1-3' Reverse  | 5'-gaaaagttgcagagactagagtccc-3'                                  |
| t-3' Forward      | 5'-atcctggaattcgtccacccctgt-3'                                   |
| t-3' Reverse      | 5'-tatagatctgcagattgtctttggctactttg-3'                           |
| TBP-3' Forward    | 5'-ggaaggccttgtgctgacccaccagc-3'                                 |
| TBP-3' Reverse    | 5'-gctagcgccgcgccaagtagcagcacagagc-3'                            |
| TBP-5' Forward    | 5'-atcgtcgactatggaccagaacaacagcctcca-3'                          |

|                          |                                               |
|--------------------------|-----------------------------------------------|
| TBP-5' Reverse           | 5'-atagcggccgcttaagagctctcagaagctggtgtggca-3' |
| Txnrd1 A                 | 5'-tatggatcctcagtttgcttccgtcag-3'             |
| Txnrd1 B                 | 5'-caacagattgcatgctcttgg-3'                   |
| Txnrd1 C                 | 5'-tatactagtgtcttggaggacgtgaagcag-3'          |
| Txnrd1 D                 | 5'-tatactagtgtcttggatttgtcac-3'               |
| Txnrd1 E                 | 5'-ctgctgaacctaaatctacagcactg-3'              |
| Txnrd1 F                 | 5'-atagaattccaaggcgacataggatgcac-3'           |
| Txnrd1 G                 | 5'-tatactagtcatagccgaatagcctct-3'             |
| TxnRd2-3' Forward        | 5'-tatggatccatactggacggcaaaccagagct-3'        |
| TxnRd2-3' Reverse        | 5'-tatgaattcgatttccaatgttgaataacctc-3'        |
| TxnRd3-3' Forward        | 5'-tatggatccagtaccaaccctaagaatcag-3'          |
| TxnRd3-3' Reverse        | 5'-gatgaattctgtctgcatcacctgtgcatatg-3'        |
| Wnt5a-3' Forward         | 5'-tatgaattcattcccctcagctacaatg-3'            |
| Wnt5a-3' Reverse         | 5'-tattgatcacacaagacagaaatgtacat-3'           |
| $\beta$ actin-3' Forward | 5'-gctgtctggtggtaccaccatgta-3'                |
| $\beta$ actin-3' Reverse | 5'-atctgctggaagggtggacagtgag-3'               |
| $\beta$ actin-5' Forward | 5'-acgatatcgctgcgctggctcgtcg-3'               |
| $\beta$ actin-5' Reverse | 5'-tggggtacttcagggtcaggatac-3'                |

---

Table S2. Cell cycle- and proliferation-dependent mRNA levels.

| mRNA <sup>1</sup> | difference <sup>2</sup> | P-value <sup>3</sup> | description                                | GenBank          |
|-------------------|-------------------------|----------------------|--------------------------------------------|------------------|
| Ccnd2             | -11.4                   | 0.03                 | cyclin D2                                  | NM_009829        |
| Ccnd2             | -10.9                   | 0.02                 | cyclin D2                                  | BQ175880         |
| Ccnd2             | -8.2                    | 0.02                 | cyclin D2                                  | AK007904         |
| Ccnd2             | -7.7                    | 0.03                 | cyclin D2                                  | NM_009829        |
| Ccnd1             | -4.0                    | 0.05                 | cyclin D1                                  | NM_007631        |
| Ccnd2             | -2.8                    | 0.05                 | cyclin D2                                  | NM_009829        |
| Ccnd1             | -2.6                    | 0.04                 | cyclin D1                                  | NM_007631        |
| Ccnd2             | -1.7                    | 0.02                 | cyclin D2                                  | NM_009829        |
| Ccni              | -1.7                    | 0.02                 | cyclin I                                   | NM_017367        |
| Cdk2              | -1.7                    | 0.02                 | cyclin-dependent kinase 2                  | NM_016756        |
| Cks2              | -1.6                    | 0.02                 | CDC28 protein kinase regulatory subunit 2  | NM_025415        |
| Ccni              | -1.5                    | 0.01                 | cyclin I                                   | NM_017367        |
| Cdk7              | -1.4                    | 0.01                 | cyclin-dependent kinase 7                  | U11822           |
| Cdk8              | -1.4                    | 0.01                 | cyclin-dependent kinase 8                  | BC025046         |
| Cdk4              | -1.3                    | 0.01                 | cyclin-dependent kinase 4                  | NM_009870        |
| Pold1             | -1.2                    | 0.05                 | DNA pol, delta 1, catalytic subunit        | BC009128         |
| Rrm1              | -1.2                    | 0.04                 | ribonucleotide reductase M1                | BB758819         |
| Polb              | -1.2                    | 0.05                 | DNA pol, beta                              | BG094331         |
| Mcm2              | -1.2                    | 0.05                 | minichromosome maintenance deficient 2     | NM_008564        |
| Mcm4              | -1.2                    | 0.04                 | minichromosome maintenance deficient 4     | BC013094         |
| Cks2              | -1.2                    | 0.01                 | CDC28 protein kinase regulatory subunit 2  | NM_025415        |
| Pole3             | -1.2                    | 0.04                 | DNA pol epsilon, subunit 3                 | AK007693         |
| Ccne2             | -1.2                    | 0.01                 | cyclin E2                                  | AF091432         |
| Ccng2             | -1.2                    | 0.03                 | cyclin G2                                  | U95826           |
| H2av              | -1.1                    | 0.05                 | H2A histone family, member V               | BC028539         |
| Dhfr              | -1.1                    | 0.03                 | dihydrofolate reductase                    | AK018462         |
| H2afz             | -1.1                    | 0.02                 | H2A histone family, member Z               | AY074806         |
| H2afy3            | -1.1                    | 0.03                 | H2A histone family, member Y2              | NM_026230        |
| Polb              | -1.1                    | 0.02                 | DNA pol, beta                              | BG094331         |
| Mcm8              | -1.1                    | 0.02                 | minichromosome maintenance deficient 8     | AK010365         |
| Pold1             | -1.1                    | 0.03                 | DNA pol, delta 1, catalytic subunit        | BC009128         |
| Cdk4              | -1.1                    | 0.00                 | cyclin-dependent kinase 4                  | NM_009870        |
| Lig1              | -1.1                    | 0.02                 | DNA ligase 1, ATP-dependent                | NM_010715        |
| Polr2k            | -1.1                    | 0.01                 | RNA pol II, polypeptide K                  | AA175187         |
| Cdk9              | -1.1                    | 0.01                 | cyclin-dependent kinase 9                  | NM_130860        |
| Hdac5             | -1.1                    | 0.02                 | histone deacetylase 5                      | NM_010412        |
| Myst3             | -1.1                    | 0.04                 | MYST histone acetyltransferase 3           | BF468324         |
| Ccnt2             | -1.1                    | 0.03                 | cyclin T2                                  | AK013634         |
| Recc1             | -1.1                    | 0.01                 | replication factor C 1                     | U01222           |
| Pole2             | -1.1                    | 0.01                 | DNA pol, epsilon 2 (p59 subunit)           | AF036898         |
| Prim1             | -1.1                    | 0.02                 | DNA primase, p49 subunit                   | J04620           |
| Orc6l             | -1.1                    | 0.01                 | origin recognition complex, subunit 6-like | NM_019716        |
| Hist1h3a          | -1.1                    | 0.02                 | histone 1, H3a                             | NM_013550 (1h4h) |
| Chrac1            | -1.1                    | 0.02                 | chromatin accessibility complex 1          | NM_053068        |
| Blm               | -1.1                    | 0.02                 | Bloom syndrome homolog                     | NM_007550        |
| Polr3d            | -1.1                    | 0.04                 | RNA pol III, polypeptide D                 | BC016102         |
| Ccnh              | -1.1                    | 0.02                 | cyclin H                                   | NM_023243        |
| Polr2g            | -1.1                    | 0.01                 | RNA pol II, polypeptide G                  | NM_026329        |
| Ccna2             | -1.1                    | 0.02                 | cyclin A2                                  | X75483           |
| Polk              | -1.1                    | 0.03                 | DNA pol, kappa                             | BC008105         |
| Cdk4              | -1.1                    | 0.05                 | cyclin-dependent kinase 4                  | NM_009870        |
| Rfc5              | -1.1                    | 0.03                 | replication factor C (activator 1) 5       | AK011489         |

|          |     |      |                                            |           |
|----------|-----|------|--------------------------------------------|-----------|
| Poldip2  | 1.0 | 0.04 | DNA pol, delta interacting protein 2       | NM_026389 |
| Orc1l    | 1.0 | 0.02 | origin recognition complex, subunit 1-like | BC015073  |
| Polr2i   | 1.0 | 0.01 | RNA pol II, polypeptide I                  | BB284638  |
| Ccnb2    | 1.0 | 0.00 | cyclin B2                                  | AK013312  |
| Rpa2     | 1.0 | 0.01 | replication protein A2                     | BC004578  |
| Cdk5     | 1.0 | 0.00 | cyclin-dependent kinase 5                  | NM_007668 |
| Orc4l    | 1.0 | 0.01 | origin recognition complex, subunit 4      | AK011550  |
| Ccne1    | 1.0 | 0.01 | cyclin E1                                  | NM_007633 |
| H3f3a    | 1.0 | 0.01 | H3 histone, family 3A                      | BB252350  |
| Prim1    | 1.0 | 0.01 | DNA primase, p49 subunit                   | J04620    |
| Ccna2    | 1.0 | 0.01 | cyclin A2                                  | X75483    |
| Poldip3  | 1.0 | 0.01 | DNA pol, delta interacting protein 3       | AK003596  |
| H2afz    | 1.0 | 0.05 | histone H2A.Z                              | AV215230  |
| Ccnh     | 1.0 | 0.01 | cyclin H                                   | NM_023243 |
| Polg2    | 1.0 | 0.04 | DNA pol, gamma 2, accessory subunit        | NM_015810 |
| Pole     | 1.0 | 0.01 | DNA pol, epsilon                           | NM_011132 |
| Pttg1    | 1.0 | 0.04 | pituitary tumor-transforming 1             | AF069051  |
| Poldip3  | 1.0 | 0.01 | DNA pol, delta interacting protein 3       | BB534975  |
| Poldip3  | 1.0 | 0.01 | DNA pol, delta interacting protein 3       | BI963573  |
| Pole4    | 1.1 | 0.03 | DNA pol, epsilon 4 (p12 subunit)           | BF577544  |
| Tyms     | 1.1 | 0.02 | thymidylate synthase                       | BC020139  |
| Hist1h3a | 1.1 | 0.02 | histone 1, H3a                             | NM_013550 |
| Poldip2  | 1.1 | 0.03 | DNA pol, delta interacting protein 2       | NM_026389 |
| Polb     | 1.1 | 0.03 | DNA pol, beta                              | BC006681  |
| Myst2    | 1.1 | 0.03 | MYST histone acetyltransferase 2           | BM225168  |
| Hdac6    | 1.1 | 0.03 | histone deacetylase 6                      | NM_010413 |
| Pole4    | 1.1 | 0.05 | DNA pol, epsilon 4 (p12 subunit)           | BF577544  |
| Poldip3  | 1.1 | 0.03 | DNA pol, delta interacting protein 3       | BB377698  |
| Prim2    | 1.1 | 0.03 | DNA primase, p58 subunit                   | NM_008922 |
| Ccnf     | 1.2 | 0.01 | cyclin F                                   | NM_007634 |
| Cdkn1a   | 1.2 | 0.04 | cyclin-dependent kinase inhibitor 1A (p21) | AK007630  |
| Pola2    | 1.2 | 0.03 | DNA pol, alpha 2                           | NM_008893 |
| Hirip5   | 1.2 | 0.04 | histone cell cycle interacting protein     | BC018355  |
| Cdk5     | 1.4 | 0.03 | cyclin-dependent kinase 5                  | NM_007668 |
| Ccnd3    | 1.6 | 0.04 | cyclin D3                                  | NM_007632 |
| Cdkn1c   | 2.0 | 0.00 | cyclin-dependent kinase inhibitor 1C (p57) | NM_009876 |

<sup>1</sup> mRNAs having multiple entries were represented by more than one oligonucleotide probe set on the arrays and thus provided independent data readouts. In some cases, probe sets were designed from different GenBank files; in other cases they were designed to a common GenBank file, as indicated in right column. <sup>2</sup> Only mRNAs in which the higher signal was  $\geq 200$  units were included. <sup>3</sup> All data based on statistical analysis of individual arrays from three wildtype and mutant littermate pairs using GeneSpring software; only mRNAs showing sufficient signal reproducibility between the three paired array sets to yield a P-value  $\leq 0.05$  were included.

Table S3, Oxidoreductase mRNA levels

| mRNA <sup>1</sup> | difference | P-value | description                                            | GenBank   | Notes |
|-------------------|------------|---------|--------------------------------------------------------|-----------|-------|
| Npn3 (Srxn1)      | 10.9       | 0.00    | neoplastic progression 3 (sulfiredoxin 1)              | BM210600  |       |
| Cbr3              | 4.9        | 0.01    | carbonyl reductase 3                                   | AK003232  |       |
| Ltb4dh            | 4.3        | 0.00    | leukotriene B4 12-dehydrogenase                        | BC014865  |       |
| Blvrb             | 3.5        | 0.00    | biliverdin reductase B                                 | BC027279  |       |
| Mod1              | 3.3        | 0.00    | malic enzyme, supernatant                              | BC011081  |       |
| Mod1              | 3.2        | 0.03    | malic enzyme, supernatant                              | AK006387  |       |
| Gpx3              | 2.5        | 0.01    | glutathione peroxidase 3                               | NM_008161 |       |
| Ehhadh            | 2.1        | 0.01    | enoyl-Co A, hydratase/3-hydroxyacyl Co A dehydrogenase | NM_023737 |       |
| Cox5a             | 1.2        | 0.04    | cytochrome c oxidase, subunit Va                       | NM_007747 |       |
| Akr1a4            | 1.2        | 0.04    | aldo-keto reductase 1 A4                               | AK009462  |       |
| Sc5d              | 1.1        | 0.05    | sterol-C5-desaturase homologue                         | AB016248  |       |
| Idh3g             | 1.1        | 0.04    | isocitrate dehydrogenase 3 (NAD+), gamma               | NM_008323 |       |
| Ndufa5            | 1.1        | 0.04    | NADH dehydrogenase 1 alpha subcomplex, 5               | NM_026614 |       |
| Ndufa5            | 1.1        | 0.03    | NADH dehydrogenase 1, alpha subcomplex, 5              | NM_026614 |       |
| Ndufab1           | 1.1        | 0.04    | NADH dehydrogenase 1, alpha/beta subcomplex, 1         | AK010307  |       |
| Cox8a             | 1.1        | 0.03    | cytochrome c oxidase, subunit VIIa                     | NM_007750 |       |
| Phgdh             | 1.1        | 0.04    | 3-phosphoglycerate dehydrogenase                       | L21027    |       |
| Cox5b             | 1.1        | 0.02    | cytochrome c oxidase, subunit Vb                       | NM_009942 |       |
| Aldh7a1           | 1.1        | 0.02    | aldehyde dehydrogenase family 7A1                      | BC012407  |       |
| Uqcrb             | 1.1        | 0.03    | ubiquinol-cytochrome c reductase binding protein       | NM_026219 |       |
| Np15              | 1.1        | 0.02    | nuclear protein 15.6                                   | BC027265  |       |
| Hibadh            | 1.1        | 0.03    | 3-hydroxyisobutyrate dehydrogenase                     | BC003914  |       |
| Prdx4             | 1.1        | 0.02    | peroxiredoxin 4                                        | NM_016764 |       |
| Tsta3             | 1.1        | 0.04    | tissue specific transplantation antigen P35B           | NM_031201 |       |
| Lisch7            | 1.1        | 0.04    | liver-specific bHLH-Zip transcription factor           | BC004672  |       |
| Cryz1             | 1.1        | 0.03    | crystallin, zeta (quinone reductase)-like 1            | BC010479  |       |
| Cox7a2            | 1.1        | 0.01    | cytochrome c oxidase, subunit VIIa 2                   | NM_009945 |       |
| Ndufa1            | 1.1        | 0.04    | NADH dehydrogenase 1 alpha subcomplex, 1               | NM_019443 |       |
| Acadm             | 1.1        | 0.03    | acetyl-Coenzyme A dehydrogenase, medium chain          | NM_007382 |       |
| Pecr              | 1.1        | 0.02    | peroxisomal trans-2-enoyl-CoA reductase                | NM_023523 |       |
| Coq6              | 1.0        | 0.03    | coenzyme Q6 homologue                                  | BC024135  |       |
| Ndufs3            | 1.0        | 0.02    | NADH dehydrogenase Fe-S protein 3                      | BC027270  |       |
| Sdhb              | 1.0        | 0.01    | succinate dehydrogenase complex, subunit B             | BC013509  |       |
| Adhfe1            | 1.0        | 0.02    | alcohol dehydrogenase, iron containing, 1              | BC026584  |       |
| Cyp51             | 1.0        | 0.00    | cytochrome P450, 51                                    | NM_020010 |       |
| Prdx1             | 1.0        | 0.03    | peroxiredoxin 1                                        | NM_011034 |       |
| Dhrs7             | 1.0        | 0.05    | dehydrogenase/reductase 7                              | AK009385  |       |
| Grhpr             | 1.0        | 0.01    | glyoxylate reductase/hydroxypyruvate reductase         | NM_080289 |       |
| Ndufv1            | 1.0        | 0.01    | NADH dehydrogenase flavoprotein 1                      | NM_133666 |       |
| Pdhb              | 1.0        | 0.02    | pyruvate dehydrogenase beta                            | AK011810  |       |
| LOC14433          | 1.0        | 0.00    | glyceraldehyde-3-phosphate dehydrogenase               | NM_008084 |       |
| Ndufa7            | -1.0       | 0.04    | NADH dehydrogenase 1 alpha subcomplex, 7               | NM_023202 |       |
| Sod2              | -1.0       | 0.02    | superoxide dismutase 2, mitochondrial                  | NM_013671 |       |
| Ndufa7            | -1.0       | 0.01    | NADH dehydrogenase 1 alpha subcomplex, 7               | NM_023202 |       |
| Hsd17b12          | -1.0       | 0.01    | hydroxysteroid (17-beta) dehydrogenase 12              | AK012103  |       |
| Glud              | -1.0       | 0.01    | glutamate dehydrogenase                                | NM_008133 |       |
| Dhodh             | -1.0       | 0.01    | dihydroorotate dehydrogenase                           | NM_020046 |       |
| Ndufa9            | -1.0       | 0.05    | NADH dehydrogenase 1 alpha subcomplex, 9               | NM_025358 |       |
| Hsd17b12          | -1.0       | 0.00    | hydroxysteroid (17-beta) dehydrogenase 12              | AK012103  |       |
| Bckdha            | -1.1       | 0.01    | branched chain ketoacid dehydrogenase E1alpha          | NM_007533 |       |
| Glud              | -1.1       | 0.02    | glutamate dehydrogenase                                | NM_008133 |       |
| Recql4            | -1.1       | 0.01    | RecQ protein-like 4                                    | NM_058214 |       |
| Decr1             | -1.1       | 0.04    | 2,4-dienoyl CoA reductase 1, mitochondrial             | NM_026172 |       |
| Ndufab1           | -1.1       | 0.03    | NADH dehydrogenase 1, alpha/beta subcomplex, 1         | AK010307  |       |
| Uqcrrs1           | -1.1       | 0.02    | ubiquinol-cytochrome c reductase, Rieske iron-sulfur 1 | AK003966  |       |
| Adh5              | -1.1       | 0.02    | alcohol dehydrogenase 5, chi                           | NM_007410 |       |
| Ndufa4            | -1.1       | 0.04    | NADH dehydrogenase 1 alpha 4                           | BC011114  |       |
| Cox5b             | -1.1       | 0.04    | cytochrome c oxidase, subunit Vb                       | NM_009942 |       |
| Prdx4             | -1.1       | 0.05    | peroxiredoxin 4                                        | NM_016764 |       |
| Impdh2            | -1.1       | 0.02    | inosine 5'-phosphate dehydrogenase 2                   | M33934    |       |
| Ndufs1            | -1.1       | 0.03    | NADH dehydrogenase Fe-S protein 1                      | BC006660  |       |
| Ldh1              | -1.1       | 0.03    | lactate dehydrogenase 1, A chain                       | NM_010699 |       |
| Fzd7              | -1.2       | 0.04    | frizzled homologue 7                                   | NM_008057 |       |
| Akr1b3            | -1.2       | 0.05    | aldo-keto reductase 1B3                                | NM_009658 |       |
| Mthfd1            | -1.2       | 0.04    | methylenetetrahydrofolate dehydrogenase                | NM_138745 |       |
| Prdx2             | -1.2       | 0.05    | peroxiredoxin 2                                        | NM_011563 |       |

<sup>1</sup> All footnotes from Table S2 are applicable to Table S3.

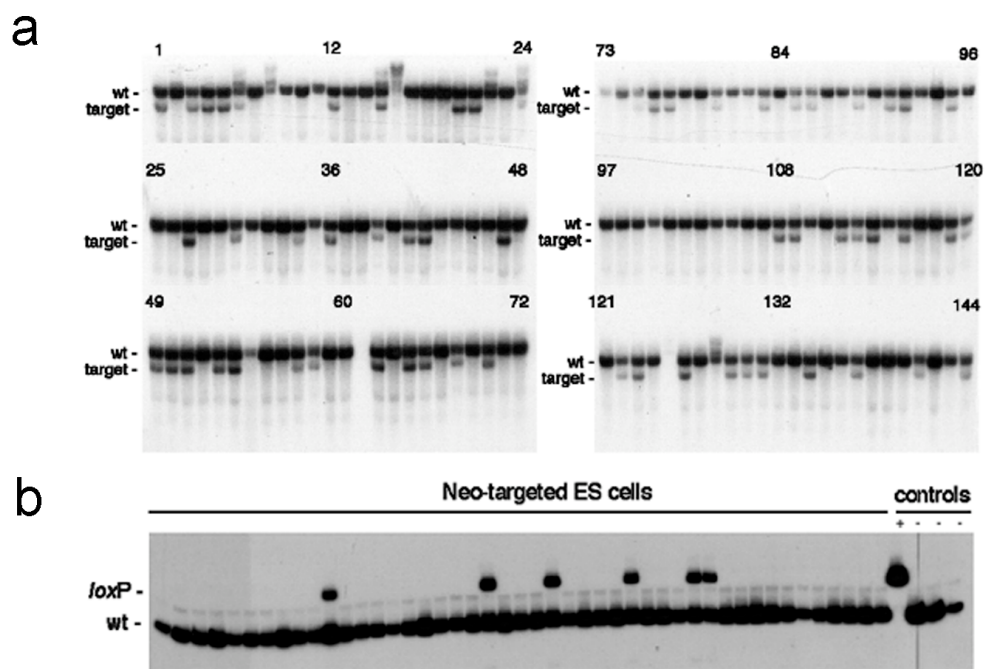

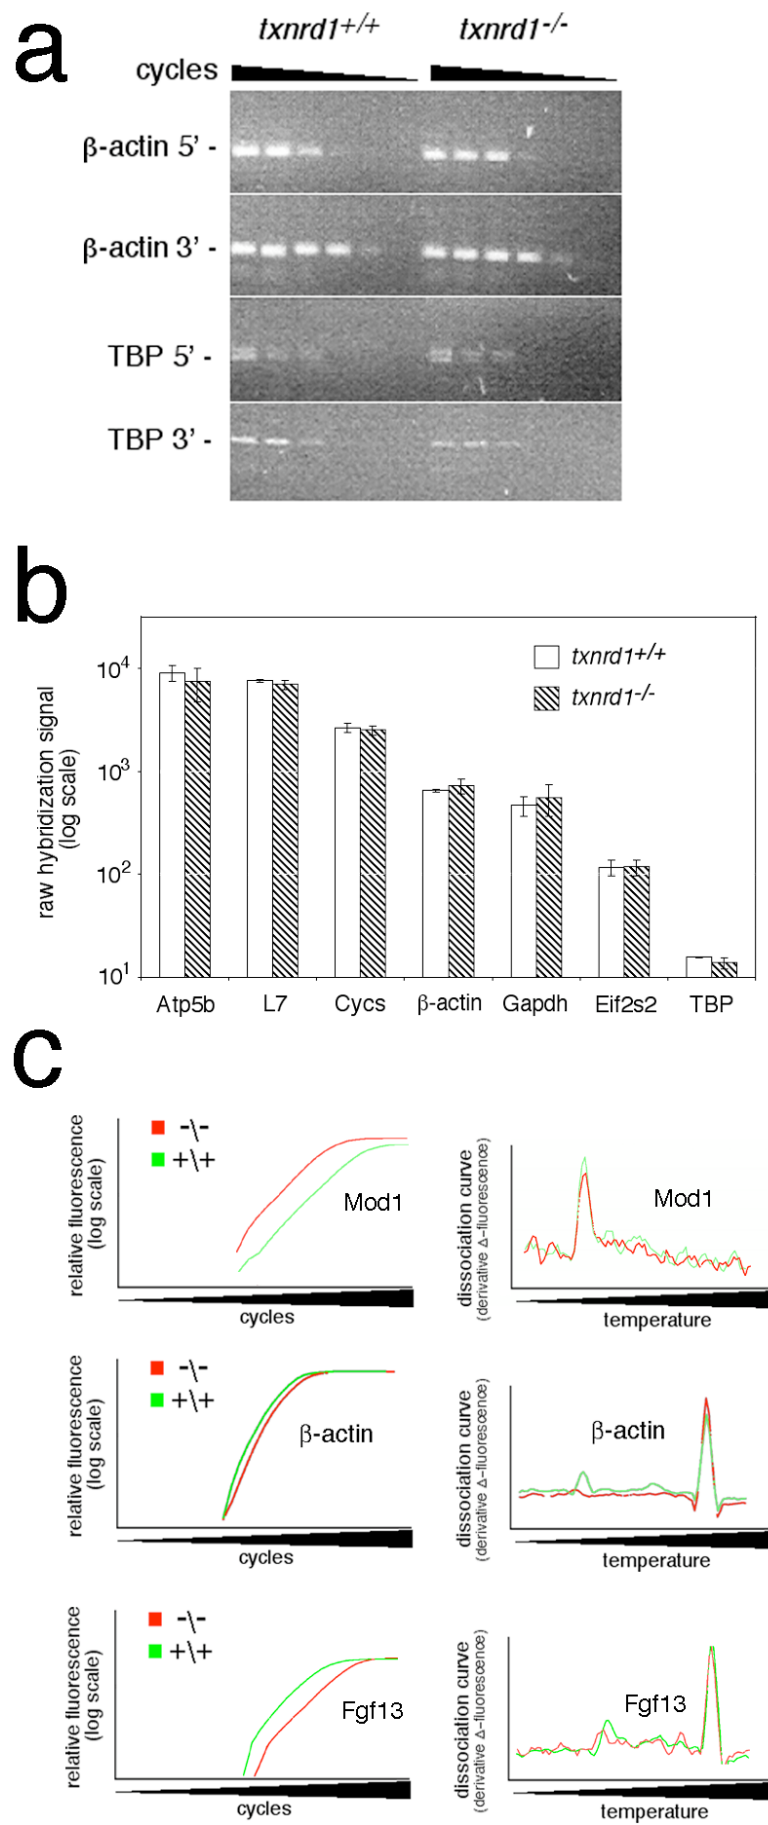

Supplement: NIHMS29667-supplement-01.pdf [file NIHMS29667-supplement-01.pdf]
